# Supplementary material for: Strong exciton coupling: a practical toolbox for computing interaction energies, wavefunctions, and optical spectra
Source: Royal Society of Chemistry journal article supplement (doi:10.1039/d6cs00157b), 2026-05-19
Supplement: d6cs00157b1.pdf [file d6cs00157b1.pdf]

## Supplementary Information for

# Strong Exciton Coupling: A Practical Toolbox for Computing Interaction Energies, Wavefunctions, and Optical Spectra

Rasmus Ringström,<sup>a</sup> S. Rasoul Hashemi,<sup>a</sup> Yuanxin Liang,<sup>a</sup> Nicholas J. Hestand,<sup>b</sup> and Karl Börjesson<sup>a†</sup>

<sup>a</sup> Department of Chemistry and Molecular Biology, University of Gothenburg, Box 462, 405 30 Gothenburg, Sweden

<sup>b</sup> Department of Natural and Applied Science, Evangel University, 1111 N. Glenstone Ave. Springfield, MO 65802, United States

Email: [karl.borjesson@gu.se](mailto:karl.borjesson@gu.se)

## Contents

|   |                                                            |    |
|---|------------------------------------------------------------|----|
| 1 | Nomenclature .....                                         | 2  |
| 2 | Point-dipole approximation derivation .....                | 7  |
| 3 | Extended dipole approximation derivation .....             | 9  |
| 4 | Derivation of Hamiltonian matrix entries for a dimer ..... | 10 |
| 5 | References.....                                            | 11 |

# 1 Nomenclature

|                                |                                                   |
|--------------------------------|---------------------------------------------------|
| $\alpha$                       | Hybrid state index                                |
| $\rho(\mathbf{r})$             | Charge density                                    |
| $\rho^{\text{tr}}(\mathbf{r})$ | Transition charge density                         |
| $\epsilon_0$                   | Vacuum permittivity                               |
| $\epsilon_s$                   | Static dielectric constant                        |
| $\epsilon_{opt}$               | Optical dielectric constant                       |
| $\epsilon$                     | Neutral excited state energy                      |
| $\epsilon_n$                   | Neutral excited state energy of molecule $n$      |
| $\sigma$                       | Row index                                         |
| $\tau$                         | Column index                                      |
| $\lambda^2$                    | Huang-Rhys factor                                 |
| $\Delta_{CT}$                  | Charge transfer induced energy correction         |
| $\eta_c$                       | Local field correction term                       |
| $\eta_L$                       | Lorentz field factor                              |
| $\lambda_+^2$                  | Huang-Rhys factor of cationic state               |
| $\lambda_-^2$                  | Huang-Rhys factor of anionic state                |
| $\lambda^2$                    | Huang-Rhys factor of neutral excited state        |
| $\tilde{\nu}$                  | Vibrational quanta in the excited state potential |
| $\nu$                          | Vibrational quanta in the ground state potential  |
| $\nu_{max}$                    | Maximum total vibrational excitations considered  |
| $\mu_i$                        | Transition dipole moment vector                   |
| $\hat{\mu}_n$                  | Transition dipole moment unit vector              |
| $\hat{\mu}$                    | Transition dipole moment operator                 |
| $ \mu_n $                      | Transition dipole moment magnitude                |
| $\omega_{\text{vib}}$          | Angular frequency of a vibrational mode           |

|                          |                                                                                                            |
|--------------------------|------------------------------------------------------------------------------------------------------------|
| $\omega_{em}$            | Angular frequency of the lowest energy hybrid state                                                        |
| $\kappa$                 | Dipole orientation factor                                                                                  |
| $\varphi_n^{e/g/+/-}$    | Electronic wavefunctions of molecule $n$ in the excited (e), ground (g), cationic (+) or anionic (-) state |
| $\psi_\alpha$            | Wavefunction of hybrid state alpha                                                                         |
| $ \psi_{em}\rangle$      | Wavefunction of the lowest energy hybrid state                                                             |
| $\Psi$                   | Wavefunction                                                                                               |
| $\chi_0^e$               | Vibrational wavefunction in the excited state                                                              |
| $\chi_0^g$               | Vibrational wavefunction in the ground state                                                               |
| $A(\omega)$              | Absorption as a function of the angular frequency                                                          |
| AO                       | Atomic orbital                                                                                             |
| $b_n$                    | Vibrational annihilation operator                                                                          |
| $b_n^\dagger$            | Vibrational creation operator                                                                              |
| $c_n^\alpha$             | Hybrid state coefficient                                                                                   |
| C                        | Eigenvector matrix                                                                                         |
| CT                       | Charge transfer                                                                                            |
| $\mathbf{d}_n$           | Displacement vector for opposite point charges in extended dipole approximation                            |
| e                        | Excited state                                                                                              |
| $E$                      | Eigenvalue matrix                                                                                          |
| $E_{CT}$                 | Charge transfer state energy                                                                               |
| $E_{CT}(1)$<br>molecules | Charge transfer state energy with cation and anion on neighbouring molecules                               |
| $Em(\omega)$             | Emission as a function of the angular frequency                                                            |
| ESP                      | Electrostatic-potential                                                                                    |
| FFT                      | Fast Fourier transform                                                                                     |
| $f_\alpha$               | Oscillator strength of hybrid state $\alpha$                                                               |

|                                                         |                                                                                                               |
|---------------------------------------------------------|---------------------------------------------------------------------------------------------------------------|
| $F_{\bar{v},v}$                                         | Overlap integral of vibronic ground state and vibronic excited state                                          |
| $\mathbf{g}$                                            | Ground state                                                                                                  |
| $ g\rangle = \varphi_1^g \varphi_2^g \dots \varphi_N^g$ | electronic aggregate ground state in which all molecules are in their electronic ground state                 |
| $ G\rangle =  g; 0_1, 0_2, \dots, 0_N\rangle$           | electronic aggregate ground state in which all molecules are in their electronic and vibrational ground state |
| $G(\mathbf{v}_t; \lambda^2)$                            | Vibrational function                                                                                          |
| $\hat{h}$                                               | Single electron Hamiltonian operator                                                                          |
| $H$                                                     | Hamiltonian matrix                                                                                            |
| $H_{mn}$                                                | Hamiltonian matrix element                                                                                    |
| $H_{\sigma\tau}$                                        | Hamiltonian matrix element                                                                                    |
| $\hat{H}$                                               | Hamiltonian operator                                                                                          |
| $\hat{H}_F$                                             | Frenkel Hamiltonian operator                                                                                  |
| $\hat{H}_{FH}$                                          | Frenkel-Holstein Hamiltonian operator                                                                         |
| $\hat{H}_{F-CT}$                                        | Frenkel-CT mixing Hamiltonian operator                                                                        |
| $\hat{H}_{vib}$                                         | Vibrational mode Hamiltonian operator                                                                         |
| $\hat{H}_{F-vib}$                                       | Exciton-vibration coupling Hamiltonian operator                                                               |
| $\hat{H}_{CT}$                                          | CT Hamiltonian operator                                                                                       |
| $\hat{H}_M$                                             | Merrifield Hamiltonian operator                                                                               |
| $\hat{H}_{MH}$                                          | Merrifield-Holstein Hamiltonian operator                                                                      |
| $I^{0-v_t}$                                             | Emission line strengths to vibrational level $v_t$                                                            |
| $J^{Coul}$                                              | Coulombic coupling strength                                                                                   |
| $J_{TDC}^{Coul}$                                        | Coulombic coupling strength from the TDC method                                                               |
| $J_{TrC}^{Coul}$                                        | Coulombic coupling strength from the TrC method                                                               |
| $J_{dipole-dipole}^{Coul}$                              | Coulombic coupling strength from the point dipole approximation method                                        |

|                                |                                                                                                                                                                                                                        |
|--------------------------------|------------------------------------------------------------------------------------------------------------------------------------------------------------------------------------------------------------------------|
| $J_{ext}^{Coul}$               | Coulombic coupling strength from the extended dipole approximation method                                                                                                                                              |
| $J_{CT}$                       | CT-mediated effective coupling term                                                                                                                                                                                    |
| $l_n$                          | Length of displacement vector for point charges in extended dipole approximation                                                                                                                                       |
| $n$                            | Molecule index                                                                                                                                                                                                         |
| $ n\rangle$                    | Basis set with molecule $n$ electronically excited and all others in their ground states                                                                                                                               |
| $ n, \tilde{v}\rangle$         | one particle state basis representing an electronic excitation localized on molecule $n$ together with $\tilde{v} = 0,1,2 \dots$ vibrational quanta                                                                    |
| $ n, \tilde{v}; n', v'\rangle$ | two particle state basis representing an electronic excitation with $\tilde{v}$ vibrational quanta on molecule $n$ , together with $v'$ vibrational quanta on a different molecule $n'$ in the ground electronic state |
| $N$                            | Total number of molecules in the system                                                                                                                                                                                |
| $NN$                           | Nearest neighbour                                                                                                                                                                                                      |
| $NNN$                          | Next nearest neighbour                                                                                                                                                                                                 |
| $N_{coh}$                      | Coherence number                                                                                                                                                                                                       |
| $m$                            | Molecule index                                                                                                                                                                                                         |
| $M_{eff}$                      | Effective mass                                                                                                                                                                                                         |
| $P_{k\xi}^{tr}$                | Atomic orbital basis                                                                                                                                                                                                   |
| $Q$                            | Point charge                                                                                                                                                                                                           |
| $q_i$                          | Transition charge                                                                                                                                                                                                      |
| $r$                            | Scalar distance between point charges                                                                                                                                                                                  |
| $\mathbf{r}$                   | Position in 3D space                                                                                                                                                                                                   |
| $\mathbf{R}$                   | Displacement vector                                                                                                                                                                                                    |
| $ \mathbf{R}  = R_{12}$        | Scalar separation                                                                                                                                                                                                      |
| $S = \lambda^2$                | Huang-Rhys factor of neutral excited state                                                                                                                                                                             |
| $S_h$                          | HOMO-HOMO orbital overlap integral                                                                                                                                                                                     |

|              |                                                                        |
|--------------|------------------------------------------------------------------------|
| $S_e$        | LUMO-LUMO orbital overlap integral                                     |
| $S_{k\xi}$   | Atomic orbital overlap matrix                                          |
| $S_0$        | Singlet ground state                                                   |
| $S_1$        | First singlet excited state                                            |
| $T_1$        | First triplet excited state                                            |
| $t_e$        | One-electron hopping integral                                          |
| $t_h$        | One-hole hopping integral                                              |
| TDC          | Transition density cube                                                |
| TDDFT        | Time-dependent density functional theory                               |
| TDFI         | Transition density fragment interaction                                |
| TDHF/CIS     | Time-dependent Hartree–Fock/Configuration Interaction Singles          |
| TrC          | Transition charge                                                      |
| TrCMM        | Transition cumulative atomic multipole moments                         |
| TrESP-CDQ    | Transition charge, dipole, and quadrupole from electrostatic potential |
| $\Delta V_i$ | Voxel volume                                                           |
| $W_{LS}$     | Homogeneous line shape function                                        |
| $\hat{x}$    | Unit vector along the x-axis                                           |
| $\hat{y}$    | Unit vector along the y-axis                                           |

## 2 Point-dipole approximation derivation

Start with the full expression for the Coulomb interaction of two transition densities

$$J = \frac{1}{4\pi\epsilon_0} \iint \frac{\rho_1^{tr}(\mathbf{r}_1)\rho_2^{tr}(\mathbf{r}_2)}{|\mathbf{r}_1 - \mathbf{r}_2|} d\mathbf{r}_1 d\mathbf{r}_2 \quad (S1)$$

Prepare the expression for Taylor expansion and introduce the centre-centre separation,  $\mathbf{R}$ . Let  $\mathbf{r}_1 = \mathbf{center\ of\ 1} + \Delta\mathbf{r}_1$   $\mathbf{r}_2 = \mathbf{center\ of\ 2} + \Delta\mathbf{r}_2$ . Where  $\Delta\mathbf{r}_1$  and  $\Delta\mathbf{r}_2$  are small displacements (relative to the centre of each distribution) of charge compared to  $\mathbf{R}$ . The denominator can now be rewritten:  $|\mathbf{r}_1 - \mathbf{r}_2| = |\mathbf{R} + (\Delta\mathbf{r}_1 - \Delta\mathbf{r}_2)| = |\mathbf{R} + \mathbf{s}|$  where  $(\Delta\mathbf{r}_1 - \Delta\mathbf{r}_2) \equiv \mathbf{s}$ . The full expression now reads

$$J = \frac{1}{4\pi\epsilon_0} \iint \frac{\rho_1^{tr}(\mathbf{r}_1)\rho_2^{tr}(\mathbf{r}_2)}{|\mathbf{R} + \mathbf{s}|} d\mathbf{r}_1 d\mathbf{r}_2 \quad (S2)$$

We want to evaluate

$$f(\mathbf{s}) = \frac{1}{|\mathbf{R} + \mathbf{s}|} \quad (S3)$$

When  $\mathbf{R} \gg \mathbf{s}$  around  $\mathbf{s} = (s_x, s_y, s_z)$ . Since  $\mathbf{s}$  is a vector variable the Taylor expansion takes the form

$$f(\mathbf{s}) \approx f(\mathbf{0}) + \sum_{i=x,y,z} \left. \frac{\partial f}{\partial s_i} \right|_{s=0} s_i + \frac{1}{2} \sum_{i,j=x,y,z} \left. \frac{\partial^2 f}{\partial s_i \partial s_j} \right|_{s=0} s_i s_j + \dots \quad (S4)$$

Resulting in

$$\frac{1}{|\mathbf{R} + \mathbf{s}|} \approx \frac{1}{R} - \frac{\mathbf{R} \cdot \mathbf{s}}{R^3} + \frac{3(\mathbf{R} \cdot \mathbf{s})^2 - R^2 s^2}{2R^5} + \dots \quad (S5)$$

Where the first term is the zeroth order, the next term is the first order and so forth. Inserted into the integral expression leads to

$$J = \frac{1}{4\pi\epsilon_0} \iint \rho_1^{tr}(\Delta\mathbf{r}_1)\rho_2^{tr}(\Delta\mathbf{r}_2) \left[ \frac{1}{R} - \frac{\mathbf{R} \cdot \mathbf{s}}{R^3} + \frac{3(\mathbf{R} \cdot \mathbf{s})^2 - R^2 s^2}{2R^5} \right] d\Delta\mathbf{r}_1 d\Delta\mathbf{r}_2 \quad (S6)$$

Where each term can be evaluated separately. For the zeroth order (monopole-monopole) term

$$J_0 = \frac{1}{4\pi\epsilon_0} \frac{1}{R} \iint \rho_1^{tr}(\Delta\mathbf{r}_1)\rho_2^{tr}(\Delta\mathbf{r}_2) d\Delta\mathbf{r}_1 d\Delta\mathbf{r}_2 \quad (S7)$$

The monopole terms

$$Q_i = \int \rho_i^{tr}(\Delta\mathbf{r}_i) d\Delta\mathbf{r}_i \quad (S8)$$

Are zero since the total charge is unchanged in the transition. Thus,  $J_0=0$ . Next is the first order (monopole-dipole) term

$$J_1 = \frac{1}{4\pi\epsilon_0} \frac{1}{R^3} \iint (\mathbf{R} \cdot \mathbf{s}) \rho_1^{tr}(\Delta\mathbf{r}_1) \rho_2^{tr}(\Delta\mathbf{r}_2) d\Delta\mathbf{r}_1 d\Delta\mathbf{r}_2 \quad (S9)$$

Substitute back  $\mathbf{s} = \Delta\mathbf{r}_2 - \Delta\mathbf{r}_1$  so  $(\mathbf{R} \cdot \mathbf{s}) = \mathbf{R} \cdot \Delta\mathbf{r}_2 - \mathbf{R} \cdot \Delta\mathbf{r}_1$  and simplify the integral

$$J_1 = \frac{1}{4\pi\epsilon_0} \frac{1}{R^3} \left[ \left( \int \rho_1^{tr}(\Delta\mathbf{r}_1) d\Delta\mathbf{r}_1 \right) \left( \int \mathbf{R} \cdot \Delta\mathbf{r}_2 \rho_2^{tr}(\Delta\mathbf{r}_2) d\Delta\mathbf{r}_2 \right) - \left( \int \mathbf{R} \cdot \Delta\mathbf{r}_1 \rho_1^{tr}(\Delta\mathbf{r}_1) d\Delta\mathbf{r}_1 \right) \left( \int \rho_2^{tr}(\Delta\mathbf{r}_2) d\Delta\mathbf{r}_2 \right) \right] \quad (S10)$$

With the definition of the transition dipole moment according to

$$\boldsymbol{\mu}_i = \int \Delta\mathbf{r}_i \rho_i^{tr}(\Delta\mathbf{r}_i) d\Delta\mathbf{r}_i \quad (S11)$$

The first order integral can be simplified to

$$J_1 = -\frac{1}{4\pi\epsilon_0} \frac{1}{R^3} [Q_1(\mathbf{R} \cdot \boldsymbol{\mu}_2) - Q_2(\mathbf{R} \cdot \boldsymbol{\mu}_1)] \quad (S12)$$

Which is also zero due to the multiplication with the monopole terms. The second order term, which represents the dipole-dipole interaction is

$$J_2 = \frac{1}{4\pi\epsilon_0} \frac{1}{2R^5} \iint [3(\mathbf{R} \cdot \mathbf{s})^2 - R^2 s^2] \rho_1^{tr}(\Delta\mathbf{r}_1) \rho_2^{tr}(\Delta\mathbf{r}_2) d\Delta\mathbf{r}_1 d\Delta\mathbf{r}_2 \quad (S13)$$

Substitute back  $\mathbf{s} = \Delta\mathbf{r}_2 - \Delta\mathbf{r}_1$  so  $(\mathbf{R} \cdot \mathbf{s}) = \mathbf{R} \cdot \Delta\mathbf{r}_2 - \mathbf{R} \cdot \Delta\mathbf{r}_1$  and  $s^2 = |\Delta\mathbf{r}_2 - \Delta\mathbf{r}_1|^2 = |\Delta\mathbf{r}_2|^2 + |\Delta\mathbf{r}_1|^2 - 2\Delta\mathbf{r}_1 \cdot \Delta\mathbf{r}_2$  Which results in  $3(\mathbf{R} \cdot \mathbf{s})^2 - R^2 s^2 = (\mathbf{R} \cdot \Delta\mathbf{r}_2 - \mathbf{R} \cdot \Delta\mathbf{r}_1)^2 - R^2(|\Delta\mathbf{r}_1|^2 + |\Delta\mathbf{r}_2|^2 - 2\Delta\mathbf{r}_1 \cdot \Delta\mathbf{r}_2)$ . After expanding the terms and evaluating the integral expression many terms will be zero as in previous steps. The surviving terms are  $-6(\mathbf{R} \cdot \Delta\mathbf{r}_1)(\mathbf{R} \cdot \Delta\mathbf{r}_2) + 2R^2(\Delta\mathbf{r}_2 \cdot \Delta\mathbf{r}_1)$  which with the definition of the transition dipole moment results in

$$J_2 = \frac{1}{4\pi\epsilon_0} \frac{1}{2R^5} [2R^2(\boldsymbol{\mu}_1 \cdot \boldsymbol{\mu}_2) - 6(\mathbf{R} \cdot \boldsymbol{\mu}_1)(\mathbf{R} \cdot \boldsymbol{\mu}_2)] = \frac{1}{4\pi\epsilon_0} \left[ \frac{\boldsymbol{\mu}_1 \cdot \boldsymbol{\mu}_2}{R^3} - \frac{3(\mathbf{R} \cdot \boldsymbol{\mu}_1)(\mathbf{R} \cdot \boldsymbol{\mu}_2)}{R^5} \right] \quad (S14)$$

### 3 Extended dipole approximation derivation

Choose a centre  $\mathbf{R}_n$  for molecule  $n$ . Represent its transition dipole moment as charges  $\pm q_n$  separated by a vector  $\mathbf{d}_n$  of length  $l_n$ . The separation vector is taken parallel to the dipole direction  $\hat{\boldsymbol{\mu}}_n$  so that  $\mathbf{d}_n = l_n \hat{\boldsymbol{\mu}}_n$ . Place the charges symmetrically about  $\mathbf{R}_n$ :

$$\mathbf{r}_n^\pm = \mathbf{R}_n \pm \frac{1}{2} \mathbf{d}_n \quad (S15)$$

With the transition density represented by  $\pm q_n$  at  $\mathbf{r}_n^\pm$  the equation for the total interaction between two transition densities as described by

$$J = \frac{1}{4\pi\epsilon_0} \iint \frac{\rho_1^{\text{tr}}(\mathbf{r}_1) \rho_2^{\text{tr}}(\mathbf{r}_2)}{|\mathbf{r}_1 - \mathbf{r}_2|} d\mathbf{r}_1 d\mathbf{r}_2 \quad (S16)$$

simplifies to the sum of four charge-charge interactions:

$$J_{\text{ext}} = \frac{1}{4\pi\epsilon_0} \left[ \frac{(+q_1)(+q_2)}{|\mathbf{r}_1^+ - \mathbf{r}_2^+|} + \frac{(-q_1)(-q_2)}{|\mathbf{r}_1^- - \mathbf{r}_2^-|} + \frac{(+q_1)(-q_2)}{|\mathbf{r}_1^+ - \mathbf{r}_2^-|} + \frac{(-q_1)(+q_2)}{|\mathbf{r}_1^- - \mathbf{r}_2^+|} \right] \quad (S17)$$

Now define the centre-centre vector  $\mathbf{R} = \mathbf{R}_2 - \mathbf{R}_1$  and with  $\mathbf{r}_k^\pm = \mathbf{R}_k \pm \frac{1}{2} \mathbf{d}_k$  rewrite each distance in terms of  $\mathbf{R}$ ,  $\mathbf{d}_1$ , and  $\mathbf{d}_2$  which leads to

$$J_{\text{ext}} = \frac{q_1 q_2}{4\pi\epsilon_0} \left[ \frac{1}{\left| \mathbf{R} + \frac{\mathbf{d}_2}{2} - \frac{\mathbf{d}_1}{2} \right|} + \frac{1}{\left| \mathbf{R} - \frac{\mathbf{d}_2}{2} + \frac{\mathbf{d}_1}{2} \right|} - \frac{1}{\left| \mathbf{R} - \frac{\mathbf{d}_2}{2} - \frac{\mathbf{d}_1}{2} \right|} - \frac{1}{\left| \mathbf{R} + \frac{\mathbf{d}_2}{2} + \frac{\mathbf{d}_1}{2} \right|} \right] \quad (S18)$$

With

$$\boldsymbol{\mu}_n = q_n \mathbf{d}_n \rightarrow q_n = \frac{|\boldsymbol{\mu}_n|}{l_n} \quad (S19)$$

The final expression is reached

$$J_{\text{ext}} = \frac{1}{4\pi\epsilon_0} \frac{|\boldsymbol{\mu}_1| |\boldsymbol{\mu}_2|}{l_1 l_2} \left[ \frac{1}{\left| \mathbf{R} + \frac{l_2}{2} \hat{\boldsymbol{\mu}}_2 - \frac{l_1}{2} \hat{\boldsymbol{\mu}}_1 \right|} + \frac{1}{\left| \mathbf{R} - \frac{l_2}{2} \hat{\boldsymbol{\mu}}_2 + \frac{l_1}{2} \hat{\boldsymbol{\mu}}_1 \right|} - \frac{1}{\left| \mathbf{R} - \frac{l_2}{2} \hat{\boldsymbol{\mu}}_2 - \frac{l_1}{2} \hat{\boldsymbol{\mu}}_1 \right|} - \frac{1}{\left| \mathbf{R} + \frac{l_2}{2} \hat{\boldsymbol{\mu}}_2 + \frac{l_1}{2} \hat{\boldsymbol{\mu}}_1 \right|} \right] \quad (S20)$$

## 4 Derivation of Hamiltonian matrix entries for a dimer

The derivation of going from the Schrödinger equation with the input wavefunction being a linear combination of basis functions, to a matrix notation containing the already defined matrix elements is here given for a dimer. The wavefunction for the excited state is:

$$\Psi = c_1|1\rangle + c_2|2\rangle \quad (S21)$$

Where the number indicates which molecule that is excited in the two basis functions,  $|n\rangle$ . The Schrödinger equation for the system is:

$$\hat{H}_F(c_1|1\rangle + c_2|2\rangle) = (\hat{H}_1 + \hat{H}_2 + \hat{H}_{12})(c_1|1\rangle + c_2|2\rangle) = E(c_1|1\rangle + c_2|2\rangle) \quad (S22)$$

Which multiplication with each complex conjugate of the basis functions will be used to build up the matrix (equation 25 in the main manuscript). Multiplication of  $\langle 1|$  on both sides' yields:

$$\begin{aligned} c_1\langle 1|\hat{H}_1|1\rangle + c_1\langle 1|\hat{H}_2|1\rangle + c_1\langle 1|\hat{H}_{12}|1\rangle + c_2\langle 1|\hat{H}_1|2\rangle + c_2\langle 1|\hat{H}_2|2\rangle + c_2\langle 1|\hat{H}_{12}|2\rangle \\ = e_1c_1\langle 1|1\rangle + e_1c_2\langle 1|2\rangle \end{aligned} \quad (S23)$$

The red terms are zero because the Hamiltonian for the individual molecular wavefunctions must operate only those wavefunctions, and on the right-hand side, the wavefunctions are orthonormal. Furthermore, the blue term is generally small (compared to the coupling strength). It describes the effect molecule two (in the ground state) has on the energy of the excited state of molecule one.<sup>1</sup> Rewriting this equation using matrix elements (equation 25 in the main manuscript) results in:

$$c_1H_{11} + c_2H_{12} = e_1c_1 \quad (S24)$$

The first row in the Hamiltonian matrix (equation 27 in the main manuscript, but for a 2x2 matrix in the example here) is now obtained. Note that the terms  $H_{11}$  and  $H_{12}$  correspond to the excitation energy of molecule 1 and the coupling energy between the two dyes,  $J$ , respectively. To get the second row, equation 22 needs to be multiplied with  $\langle 2|$ :

$$\begin{aligned} c_1\langle 2|\hat{H}_1|1\rangle + c_1\langle 2|\hat{H}_2|1\rangle + c_1\langle 2|\hat{H}_{12}|1\rangle + c_2\langle 2|\hat{H}_1|2\rangle + c_2\langle 2|\hat{H}_2|2\rangle + c_2\langle 2|\hat{H}_{12}|2\rangle \\ = e_2c_1\langle 2|1\rangle + e_2c_2\langle 2|2\rangle \end{aligned} \quad (S25)$$

Again, the red terms are zero, and the blue is assumed to be negligibly small, and rewriting using matrix elements yields:

$$c_1H_{21} + c_2H_{22} = e_2c_2 \quad (S26)$$

And the complete coupling matrix for the dimer can be obtained by combining equation 24 and equation 26 into matrix form:

$$HC = \begin{bmatrix} H_{11} & H_{12} \\ H_{21} & H_{22} \end{bmatrix} \begin{bmatrix} c_1 \\ c_2 \end{bmatrix} = \begin{bmatrix} e_1 & e_2 \end{bmatrix} \begin{bmatrix} c_1 \\ c_2 \end{bmatrix} = EC \quad (S27)$$

## 5 References

1. Parson, W. W. Modern optical spectroscopy: With exercises and examples from biophysics and biochemistry, second edition. *Modern Optical Spectroscopy: With Exercises and Examples from Biophysics and Biochemistry, Second Edition* 1–572 (2015)  
doi:10.1007/978-3-662-46777-0/COVER.
